# Supplementary material
Source: PubMed Central journal article supplement (PMC8274778)
Supplement: tpmd201411.SD1.pdf [file tpmd201411.SD1.pdf]

**Supplemental Table 1. Articles included in the systematic review**

| <b>Number</b> | <b>Year of publication</b> | <b>Reference</b>                                                                                                                                       | <b>Country</b>           |
|---------------|----------------------------|--------------------------------------------------------------------------------------------------------------------------------------------------------|--------------------------|
| 1             | 1900                       | Seeber G. Un nuevo esporozuario parasito del hombre: dos casos encontrados en polipos nasales. Thesis Univ Nac B Aires. 1900.                          | Argentina                |
| 2             | 1926                       | Parodi SE. El "Rhinosporidium seeberi" en nuestro país. Segunda Reunión Soc Argent de Pat Reg Del Norte. 1926.                                         | Argentina                |
| 3             | 1927                       | Parodi SE. Sobre un nuevo caso de "Rhinosporidium seeberi". Tercer Congreso Nacional De Medicina. 1927;7:677.                                          | Argentina                |
| 4             | 1930                       | Weller CV, Rikker AD. Rhinosporidium seeberi: Pathological Histology and Report of the Third Case from the United States. Am J Pathol. 1930;6:721-732. | United States of America |
| 5             | 1930                       | Ruiz FR. Nueva observación sobre "Rhinosporidium seeberi". Quinta R Soc Arg de Pat Reg del Norte. 1930.                                                | Argentina                |
| 6             | 1931                       | Hanson WL. Rhinosporidium. Ann Otol Rhin Laryngol. 1931;40:1013-1020.                                                                                  | United States of         |

|    |      |                                                                                                                                              |                          |
|----|------|----------------------------------------------------------------------------------------------------------------------------------------------|--------------------------|
|    |      |                                                                                                                                              | America                  |
| 7  | 1932 | Graham GS. Rhinosporidiun Seeberi in nasal polyp. Am J Clin Pathol. 1932;2:73-85.                                                            | United States of America |
| 8  | 1932 | Almeida FP. As blastomycosis no Brasil. An Fac Med São Paulo. 1933;9:69-164.                                                                 | Brazil                   |
| 9  | 1938 | Pasternack JG, Alexander CS. Rhinosporidium seeberi an etiologic agent in the production of nasal polyps. Arch Otolaryngol. 1938;27:746-765. | United States of America |
| 10 | 1938 | Caldwell GT, Roberts JD. Rhinosporidiosis in the United States. Report of a case originating in Texas. JAMA. 1938;110:1641-1644.             | United States of America |
| 11 | 1939 | Ruchman J. Rhinosporidiosis (seeber) First occurrence in a female in North America. Arch Otolaryngol. 1939;30:239-246.                       | United States of America |
| 12 | 1939 | Anderson WB, Byrnes TH. A case of Rhinosporidium of the conjunctiva. Am J Ophth. 1939;22:1383-1388.                                          | United States of America |
| 13 | 1939 | Griffey. Rhinosporidiosis. A case report. Am J Ophth. 1939;22:1389-1390.                                                                     | United States of America |
| 14 | 1940 | Barnshaw HD, Read WT. Rhinosporidoisis of the conjunctiva. Arch Ophth. 1940;24:357-361.                                                      | United States of America |
| 15 | 1940 | Bacigalupo J. Pólipo nasal a "Rhinosporidium seeberi". La Sem Med 1940;2:1321.                                                               | Argentina                |

|    |      |                                                                                                                                                                        |                          |
|----|------|------------------------------------------------------------------------------------------------------------------------------------------------------------------------|--------------------------|
| 16 | 1941 | Elles NB. Rhinosporidium seeberi infection of the eye. Arch Ophth. 1941;25:969-991.                                                                                    | United States of America |
| 17 | 1942 | Arnold R, Whildin J. Rhinosporidiosis of the conjunctiva. Case report. Am J Ophth 1942;25:1227-1230.                                                                   | United States of America |
| 18 | 1942 | Tato JM. Granuloma nasal a "Rhinosporidium seeberi" (sexta observación argentina). Rev Otorrinolaringología del Litoral 1 / Arch Soc Argent de Anat Normal y Pat 4 54. | Argentina                |
| 19 | 1942 | Brachetto BD. Granuloma nasal a "Rhinosporidium seeberi" (séptima observación argentina). Arch Soc Argent Anat Normal y Pat 4 64.                                      | Argentina                |
| 20 | 1943 | Boggino J, Ammatuna E. Rhinosporidiosis conjuntival. An Fac Cienc Med Asunción 1943;11:163-165.                                                                        | Paraguay                 |
| 21 | 1945 | Di Pietro. Granuloma nasal a "Rhinosporidium seeberi" (octava observación argentina). Arch Soc Argent Anat Normal y Pat. 1945;7:169.                                   | Argentina                |
| 22 | 1946 | Mazza S, Freire RS. Sobre el décimo caso argentino de rinosporidiosis humana por Rhinosporidium seeberi. La Sem Med. 1946;2:205.                                       | Argentina                |
| 23 | 1948 | Marks RF, Johnstone HG. Nasal                                                                                                                                          | United                   |

|    |      |                                                                                                                             |                                |
|----|------|-----------------------------------------------------------------------------------------------------------------------------|--------------------------------|
|    |      | rhinosporidiosis. Laryngoscope.<br>1948;58:1108-17.                                                                         | States of<br>America           |
| 24 | 1948 | Lanier LH, Carter CF. Rhinosporidiosis; report of two cases in brothers. Eye Ear Nose Throat Mon. 1948;27:182-4.            | United<br>States of<br>America |
| 25 | 1949 | Nino FL. Rhinosporidiosis granuloma or Rhinosporidium seeberi Seeber disease. Rev Asoc Med Argent. 1949;63:133-4.           | Argentina                      |
| 26 | 1949 | Coelho B. Rhinosporidiosis. Folha Med. 1949;30:34.                                                                          | Brazil                         |
| 27 | 1949 | Bocacio J, Becker FF. Sobre um caso de rinosporidiose palpebral e conjuntival. Rev Med e Cir Porto Alegre. 1949;11:42.      | Brazil                         |
| 28 | 1950 | Méndez AL. Rinosporidiosis (informe de dos casos). Revista del Hospital La Samaritana. 1950;1:17-21.                        | Colombia                       |
| 29 | 1950 | Mendiola R, Cortés Ochoa R. Rinosporidiosis. Primer caso encontrado en México. Rev Inst Salubr Enferm Trop. 1950;11:159-65. | Mexico                         |
| 30 | 1951 | Boles RG, Maiden SD. A case of rhinosporidiosis. Ann Otol Rhin Laryngol. 1951;60:249-252.                                   | United<br>States of<br>America |
| 31 | 1955 | Coutinho EM. Rhinosporidiose: estudo anatomopatológico de 4 casos: Ann Fac Med Univ Recife. 1955;15:41-46.                  | Brazil                         |
| 32 | 1957 | Souza JL, Lacaz CS, Pasqualucci MEA.                                                                                        | Brazil                         |

|    |      |                                                                                                                                                      |                          |
|----|------|------------------------------------------------------------------------------------------------------------------------------------------------------|--------------------------|
|    |      | Rhinosporidiose ocular. Rev Adolfo Lutz. 1957;154-160.                                                                                               |                          |
| 33 | 1958 | Rapaport M. Rhinosporidiosis of the conjutival conjunctiva. Prensa Med Argent. 1958;45:589-93.                                                       | Argentina                |
| 34 | 1959 | Piva N, Trindade CG, Almeida WPM, Nobrega O. Rinosporidiose. Arq Centro Estudos Hospital Cirurgia. 1959;8:75.                                        | Brazil                   |
| 35 | 1960 | Norman WB. Rhinosporidiosis in Texas. Arch Otolaryngol. 1960;72:361-2.                                                                               | United States of America |
| 36 | 1961 | Azevedo ML, Belletato AS, Krug A. Rinosporidiose conjunctival: Quatro casos observados no Brasil. Arq Bras Oftalmol. 1961;24:37-45.                  | Brazil                   |
| 37 | 1961 | Azevedo ML. Records the fourth case of Rhinosporidiosis in Brazil. Oflahn Argent Brasil. 1961;24:37.                                                 | Brazil                   |
| 38 | 1961 | Cantidio UM. Rinosporidiose. Rev Fac Med Univ Ceará, 1961;1:79-89.                                                                                   | Brazil                   |
| 39 | 1963 | Bojanini E. Rinosporidiosis. Presentación de 5 casos autóctonos. Ant Med. 1963;14:237-245.                                                           | Colombia                 |
| 40 | 1963 | Cáceres R. Rinosporidiosis: Revisión de la casuística colombiana y presentación de un caso. Acta de Otorrinolaringológica de Colombia. 1963;2:27-32. | Colombia                 |
| 41 | 1964 | Neumayr TG. Bilateral rhinosporidiosis of the                                                                                                        | United                   |

|    |      |                                                                                                                                                   |                          |
|----|------|---------------------------------------------------------------------------------------------------------------------------------------------------|--------------------------|
|    |      | conjuntiva. Arch Ophthalmol. 1964;71:379-81.                                                                                                      | States of America        |
| 42 | 1964 | López Ballesteros H, Hurtado H, Correo E. Cuadernos del Hospital de Clinicas. 1964. pp 13-27.                                                     | Colombia                 |
| 43 | 1967 | Zetina Mora E. Comunicación de un caso de rinosporidiosis. Rev Invest Salud Pública (Méx.) 1967;27:275-84.                                        | Mexico                   |
| 44 | 1968 | Jorge NES. Ocorrença de rinosporidiosis humana no Município de Arroio Grande, Estado do Rio Grande do Sul. Hospital (Rio). 1968;74:273-7.         | Brazil                   |
| 45 | 1969 | Peters HJ, DeBelly CG. Conjunctival polyp caused by Rhinosporidium seeberi. Am J Clin Pathol. 1969;51:256-9.                                      | United States of America |
| 46 | 1971 | Gómez de las Rosas R. Rinosporidiasis ocular. Rev Cub Med. 1971;10:541-5.                                                                         | Cuba                     |
| 47 | 1972 | Miziara HL, Santos FAM, Kalil RK. Rinosporidiose nasal - Aspectos epidemiológicos e anatomo-patológicos em 10 casos. Rev Pat Trop. 1972;1:473-80. | Brazil                   |
| 48 | 1972 | Goez Monteiro R. Rinosporidiose conjuntival. Arch Bras Oftalmol. 1972;35:127-30.                                                                  | Brazil                   |
| 49 | 1973 | Agostini Netto J, Furtado T. La Rinosporidiose au Brésil. Int J Derm. 1973;12:110-4.                                                              | Brazil                   |
| 50 | 1974 | Rolon PA. Rinosporidiosis. Epidemiología                                                                                                          | Paraguay                 |

|    |      |                                                                                                                                                                                                                          |                                |
|----|------|--------------------------------------------------------------------------------------------------------------------------------------------------------------------------------------------------------------------------|--------------------------------|
|    |      | en la República de Paraguay.<br>Mycopathologia et Mycologia applicata<br>1974; 52: 155-171.                                                                                                                              |                                |
| 51 | 1975 | Da Silva JF, da Silva WM, Nogueira AM,<br>Cavalcante SE. Rinosporidiose nasal - Estudo<br>de 11 casos. Rev Soc Bras Med Trop.<br>1975;Jan-Fev:19-25                                                                      | Brazil                         |
| 52 | 1975 | González Mendoza A, Austria B.<br>Rinosporidiosis en México. Revisión de la<br>literatura nacional y comentarios<br>epidemiológicos a propósito de la<br>observación de dos casos. Bol. Soc. Mex.<br>Mic. 1975;9:149-53. | Mexico                         |
| 53 | 1976 | Lasser A, Smith HW. Rhinosporidiosis. Arch<br>Otolaryngol. 1976;102:308-31.                                                                                                                                              | United<br>States of<br>America |
| 54 | 1977 | Arciniegas Y, Duarte R. Rinosporidiosis.<br>Consulta. 1977;4:7-8.                                                                                                                                                        | Colombia                       |
| 55 | 1977 | Reynoso-García M, G Vivar-Mejía.<br>Rinosporidiosis nasal. Gac Meed Mex.<br>1977;113:363-5.                                                                                                                              | Mexico                         |
| 56 | 1978 | Sánchez R. Rhinosporidiosis. An<br>Otorrinolaringol Ibero Am. 1978;5:253-7.                                                                                                                                              | Mexico                         |
| 57 | 1980 | Prevost E, Kreutner A Jr, Vallotton WW,<br>Walker EM. Conjunctival lesion caused by<br>Rhinosporidium seeberi. South Med J.<br>1980;73:1077-9.                                                                           | United<br>States of<br>America |
| 58 | 1984 | Jiménez JF, Young DE, Hough AJ.                                                                                                                                                                                          | United                         |

|    |      |                                                                                                                                                         |                          |
|----|------|---------------------------------------------------------------------------------------------------------------------------------------------------------|--------------------------|
|    |      | Rhinosporidiosis. A report of two cases from Arkansas. Am J Clin Pathol. 1984;82:611-5.                                                                 | States of America        |
| 59 | 1984 | Woodard BH, Hudson J. Rhinosporidiosis ultra structural study of an infection in South Carolina. South Med J. 1984;77:1587.                             | United States of America |
| 60 | 1984 | Villasmil P, Antzoulatos G. Rinosporidiosis conjuntival. A propòsito de tres casos. Rev Oftalmol Venez. 1984;42:246-9.                                  | Venezuela                |
| 61 | 1985 | Roberson MC. Conjunctival Rhinosporidiosis. Ann Ophthalmol. 1985;17:262-3.                                                                              | United States of America |
| 62 | 1985 | González G. Rinosporidiosis. Rev Otorrinolaringol Cir Cabeza Cuello. 1985;45:39-43.                                                                     | Chile                    |
| 63 | 1986 | Mattedi MGS, Cunha A, Boni ES, Palhano Júnior L. Rinosporidiose nasal. An Bras Dermatol. 1986;61:141-4.                                                 | Brazil                   |
| 64 | 1986 | Martínez Martínez A. Rinosporidiosis en Colombia. Presentación de 7 casos nuevos y revisión de la casuística nacional. Rev UIS-Medicina. 1986;14:49-60. | Colombia                 |
| 65 | 1986 | Lai R, Ríos B, Sánchez G. Rinosporidiosis. Rev Med Panama 1986; 11: 82-86.                                                                              | Panama                   |
| 66 | 1987 | Pascual MB, Guimenez M, Bit Chakoch E, Arjol O. Nuevo caso de rinosporidiosis                                                                           | Argentina                |



|    |      |                                                                                                                                                                         |                          |
|----|------|-------------------------------------------------------------------------------------------------------------------------------------------------------------------------|--------------------------|
|    |      | humana en la provincia del Chaco. Rev Argent Micol. 1987;10:22-4.                                                                                                       |                          |
| 67 | 1987 | Nair S, Hannah P. Rhinosporidiosis of vagina: A case report. J Trop Med Hyg. 1987;90:329.                                                                               | United States of America |
| 68 | 1988 | Oddó D, Lobos T. Micosis inhabituales en Chile: Comunicación de 10 casos. Rev Med Chil. 1988;116:1135-42.                                                               | Chile                    |
| 69 | 1988 | Bulnes Mendizábal D, Izquierdo W, Lora Cárdenas G. Nasal rhinosporidiosis. Description of a case and review of the literature. Bol Méd Hosp Infant Méx. 1988;45:386-9.  | Mexico                   |
| 70 | 1989 | Vicens de Sobas D, Rodríguez de Arévalo H, Casanova E. Rinosporidiosis nasal: Presentación de un caso con invasión frontoetmoidal. Bol Hosp Univ Caracas. 1989;19:60-3. | Venezuela                |
| 71 | 1989 | Beltrán F, Durán F, De Buen S. Rinosporidiosis conjuntival. Rev Mex Oftalmol. 1989;63:29-32.                                                                            | Mexico                   |
| 72 | 1989 | Andrade NA. Rinosporidiose Nasal. Arq Bras Med Nav. 1989;50:79-88.                                                                                                      | Brazil                   |
| 73 | 1990 | Fonseca APM, Fonseca WSM, Bona SH, Lopes Filho LL, Araújo RC. Rinosporidiose nasal: relato de dois casos. An Bras Dermatol. 1990;65:123-4.                              | Brazil                   |
| 74 | 1992 | Hernandez R. Rinosporidiosis en el                                                                                                                                      | Brazil                   |

|    |      |                                                                                                                                                     |                                |
|----|------|-----------------------------------------------------------------------------------------------------------------------------------------------------|--------------------------------|
|    |      | Estado de Barinas. Dermatol. Venez.<br>1992;30:143-51.                                                                                              |                                |
| 75 | 1993 | Correa A, de Guevara E, Noriega E, et al.<br>Rinosporidiosis nasal: presentación de un<br>caso. Rev Colomb Derm. 1993;2:60-1.                       | Colombia                       |
| 76 | 1994 | Rodríguez G, Sarmiento L, Hernández CA.<br>Leshmaniasis cutánea y otras lesiones<br>destruictivas centofaciales. Biomédica.<br>1994;14:215-29.      | Colombia                       |
| 77 | 1994 | Franca GV, Gomes CC, Sakano E, Altemani<br>A, Shimizu LT. Rinosporidiose nasal na<br>infância. J Pediatr (Rio J). 1994;70:299-301.                  | Brazil                         |
| 78 | 1995 | Gobbo JF, Arteta LMC, Rodrigues RP,<br>Andrade JA. Rinosporidiose: a propósito<br>de um caso. Braz J Otorrinolaringol<br>1995;61:160-161.           | Brazil                         |
| 79 | 1995 | Vélez A, Arango JC, Martínez JJ.<br>Rinosporidiosis conjuntival. Iatreia.<br>1995;8:170-2.                                                          | Colombia                       |
| 80 | 1995 | Vélez A, Arango JC. Rinosporidiosis nasal.<br>Rev Colomb Derm. 1995;4:203-4.                                                                        | Colombia                       |
| 81 | 1996 | Gaines JJ Jr, Clay JR, Chandler FW, Powell<br>ME, Sheffield PA, Keller AP. Rhinosporidiosis:<br>Three domestic cases. South Med<br>J. 1996;89:65-7. | United<br>States of<br>America |
| 82 | 1996 | Galuppo MT, Carlini D, Carmo J, Carneiro PC,<br>Formigoni LM, Pizarro CF, Zequi SC.<br>Rinosporidiose nasal: Relato de caso. Folha                  | Brazil                         |

|    |      |                                                                                                                                                                                     |                          |
|----|------|-------------------------------------------------------------------------------------------------------------------------------------------------------------------------------------|--------------------------|
|    |      | Méd. 1996;113(supl.2):123-5.                                                                                                                                                        |                          |
| 83 | 1996 | Suárez M, Rodríguez J, Duarte A, López VM, Bermúdez A, Salcedo E, Peláez R. Reporte del primer caso de rinosporidiosis en la provincia Ciego de Avila, Cuba. Bol Micol. 1996;11:15. | Cuba                     |
| 84 | 1997 | Reidy JJ, Sudesh S, Klafter AB, Olivia C. Infection of the conjunctiva by Rhinosporidium seeberi. Surv Ophthalmol. 1997;41:409-13.                                                  | United states of America |
| 85 | 1998 | Vélez A, Robledo M, Arango JC, Vieco B, Duque CS. El caso de infecciosas. Rinosporidiosis, presentación de diez casos y revisión de la literatura. Medicina UPB. 1998;17:49-54.     | Colombia                 |
| 86 | 1998 | Ramos S, Ramos RF, Vargas PR, Caetano RF, Figueiredo FA, Souza FS. Rinosporidiose: Reporte de um caso. Rev. Bras. Med. Otorrinolaringol. 1998;5:159-61.                             | Brazil                   |
| 87 | 2001 | Jaramillo J, Ponce C, Plata R. Rinosporidiosis ocular. Rev Fac Cienc Salud Univ Cauca. 2001;3:31-4.                                                                                 | Colombia                 |
| 88 | 2001 | Montalvo A, Rosales B, Franco D. Rinosporidiosis, presentación de un caso. Rev Fac Cien Méd. 2001;26:38-40.                                                                         | Ecuador                  |
| 89 | 2002 | Semedo F, Melo Z, Sessino D, Rodrigues J, Boni M. Rinosporidiosis ocular, presentación                                                                                              | Brazil                   |

|    |      |                                                                                                                                                                                                                                        |           |
|----|------|----------------------------------------------------------------------------------------------------------------------------------------------------------------------------------------------------------------------------------------|-----------|
|    |      | de tres casos y revisión de la literatura científica. Arq Bras Oftalmol. 2002;65:103-5.                                                                                                                                                |           |
| 90 | 2004 | Cirion Martínez. Diagnóstico histológico de rinosporidiosis en el Hospital Dom Orione, Brasil. 1999 – 2001. IV Congreso virtual hispanoamericano de anatomía patológica. Cuba. 2004.                                                   | Brazil    |
| 91 | 2004 | Faures Vergara L, Abreu Ruano O, Machado Puerto I, Sotero Molina MC, Pérez Cuellar H. Rinosporidiosis conjuntival. Hallazgo incidental en un paciente cubano. VI Congreso virtual hispanoamericano de anatomía patológica. Cuba. 2004. | Cuba      |
| 92 | 2005 | Arenas A, Petrosino P, García M, Súnico A, Cammarata F, et al. Rhinosporidiosis: Presentación de tres casos y revisión de la literatura. Informed. 2005;7(2).                                                                          | Venezuela |
| 93 | 2006 | Harissi-Dagher M, Robillars N, Corriveau C, Mabon M, Allaire GS. Histopathologically confirmed ocular rhinosporidiosis in two Canadians. Can J Ophthalmol. 2006;41:226-9.                                                              | Canada    |
| 94 | 2005 | Ramos J, Fedirka J. Rinosporidiosis conjuntival recidivante. Archivos de Oftalmología de Buenos Aires. 2005;78:108-114.                                                                                                                | Argentina |
| 95 | 2007 | Abud DL, Pereira JC. Rinosporidiose                                                                                                                                                                                                    | Brazil    |

|     |      |                                                                                                                                                                                                                     |                          |
|-----|------|---------------------------------------------------------------------------------------------------------------------------------------------------------------------------------------------------------------------|--------------------------|
|     |      | Nasal - Relato de Quatro Casos e Revisão de Literatura Nasal Rhinosporidiosis - Four Cases Relate and Literature Review. Int. Arch. Otorhinolaryngol. 2007;11:214-9.                                                |                          |
| 96  | 2007 | Tzelikis PFM, Martins HC, Vilela G, Akaishi L. Afilamento escleral em paciente com rinosporidiose conjuntival. Rev Bras Oftalmol. 2007;66:337-40.                                                                   | Brazil                   |
| 97  | 2007 | Angulo F, Castillo A, Angulo R. Rinosporidiosis Nasal: A propósito de un caso. CIMEL. 2007;12:12:26-28.                                                                                                             | Venezuela                |
| 98  | 2008 | Aguilera Pareja M. Rinosporidiosis, un caso en Santa Cruz de la Sierra, Bolivia. Reflexionando en otorrinonaringologia. Ed La Hoguera. 2008, pp 111-117.                                                            | Bolivia                  |
| 99  | 2009 | Suh HL, Barron J, Dubovy SR, Gaunt ML, Ledee DR, Miller D, Fell JW, Forster RK. Ocular rhinosporidiosis presenting as chronic follicular conjunctivitis in a contact lens wearer. Arch Ophthalmol. 2009;127:1076-7. | United States of America |
| 100 | 2009 | Crosara PF, Becker CG, Freitas VA, Nunes FB, Becker HM, Guimaraes RE. Rinosporidiose nasal: diagnóstico diferencial de sinusite fúngica e papiloma invertido. Arq Int Otorrinolaringol. 2009;13:93-5.               | Brazil                   |
| 101 | 2009 | Sembergman J. Rinosporidiosis Nasal.                                                                                                                                                                                | Venezuela                |

|     |      |                                                                                                                                                                                                |          |
|-----|------|------------------------------------------------------------------------------------------------------------------------------------------------------------------------------------------------|----------|
|     |      | Revisión a propósito de un caso. Acta otorrinolaringológica. 2009;21:2-7.                                                                                                                      |          |
| 102 | 2010 | Brevis P, Morales E, Bravo JC, Monasterio V, Mánques V, Zaror L, Abaca P, Toloza L. Un nuevo caso de rinosporidiosis en Chile. Rev Iberoam Micol. 2010;27:183-5.                               | Chile    |
| 103 | 2011 | Vélez A, Salazar G, Monsalve P. Rinosporidiosis ocular, presentación de tres casos y revisión de la literatura científica. Infectio. 2011;15:202-4.                                            | Colombia |
| 104 | 2011 | Toro Millán MA, Pinilla Gómez CM, Baquero Ospina PE, Echeverry Caicedo LJ, Talero SL. Rinosporidiosis palpebral. Reporte de caso. Revista Sociedad Colombiana de Oftalmología. 2013;46:224-30. | Colombia |
| 105 | 2011 | Vallarelli AF, Rosa SP, Souza EM. Rhinosporidiosis: Cutaneous manifestation. An Bras Dermatol. 2011;86:373-4.                                                                                  | Brazil   |
| 106 | 2012 | Milanés Pérez RI, Caro Vásquez CM, Vélez Duncan CA, Marrugo Grice O. Diagnóstico diferencial de la rinosporidiosis: A propósito de un caso. Iatreia. 2012;25:272-6.                            | Colombia |
| 107 | 2014 | Zoroaquiain P, Moreno A, Oddó D. Rinosporidiosis ocular diagnosticada                                                                                                                          | Chile    |

|     |      |                                                                                                                                                                                                                      |          |
|-----|------|----------------------------------------------------------------------------------------------------------------------------------------------------------------------------------------------------------------------|----------|
|     |      | mediante estudio histopatológico. Rev Chil Infect. 2014;31:213-5.                                                                                                                                                    |          |
| 108 | 2016 | Aquino TA, Costa MC, Costa IM, Campbell IP. Nasal Rhinosporidiosis: a report of two cases. International J Derm. 2016;55:1275-7.                                                                                     | Brazil   |
| 109 | 2016 | Krauss K, Bahamonde H, Karle M. Nasal Rhinosporidiosis: New case report and review. Rev Otorrinolaringol Cir Cabeza Cuello. 2016;76:320-324.                                                                         | Chile    |
| 110 | 2016 | Almeida FA, Feitoza Lde M, Pinho JD, Mello GC, Lages JS, Silva FF, Silva RR, Silva GE. Rhinosporidiosis: The largest case series in Brazil. Rev Soc Bras Med Trop. 2016;49:473-6.                                    | Brazil   |
| 111 | 2018 | Carneiro LF, Belfort AF, Ferreira CS, Pedrosa MS, Brasileiro TP, Rolim H. Case report: Conjunctival Rhinosporidiosis Associated to scleral extasia. EC Ophthalmology. 2018;9.3:135-139.                              | Brazil   |
| 112 | 2018 | Costa EF, Pinto LM, Campos MAG, Gomes TM, Silva GEB. Partial regression of large anterior scleral staphyloma secondary to rhinosporidiosis after corneoscleral graft - a case report. BMC Ophthalmology. 2018;18:61. | Brazil   |
| 113 | 2018 | Vélez A, Jiménez G, Hidrón A, Talero SL, Agudelo CA. Rhinosporidiosis in Colombia: case series and literature review. Trop Doctor. 2018;48:289-93.                                                                   | Colombia |

|     |      |                                                                                                                                                                                                                             |               |
|-----|------|-----------------------------------------------------------------------------------------------------------------------------------------------------------------------------------------------------------------------------|---------------|
| 114 | 2019 | Deluc N, Roux G, Barthelemy T, Labbé M, Epelboin L, Labbé S. First case of ocular rhinosporidiosis in French Guiana. Ann Pathol. 2019;39:57-59.                                                                             | French Guiana |
| 115 | 2019 | Araujo Almeida F, Almeida FA, Teixeira-Junior AAL, Pinho JD, Costa EF, Silva GEB. Evaluation of diagnosed cases of eye rhinosporidiosis in a public hospital of Maranhão, Northeast Brazil. BMC Ophthalmology. 2019;19:218. | Brazil        |
